## 40 **Summary**

41           Pain therapies targeting the cannabinoid system are increasing with expansion of  
42 cannabis legalization but adaptations in the endogenous cannabinoid system during  
43 inflammatory pain could limit their efficacy. Presynaptic inhibition of GABA release  
44 mediated by cannabinoid 1 receptor (CB1R) agonists in the ventrolateral periaqueductal  
45 gray (vlPAG) is markedly reduced in male and female Sprague Dawley rats after  
46 persistent inflammation induced by Complete Freund's Adjuvant (CFA). Inflammation  
47 results in increased endocannabinoid (eCB) synthesis and desensitization of  
48 presynaptic CB1Rs that is reversed by a GRK2/3 inhibitor, Compound 101. Despite  
49 CB1R desensitization, eCB activation of CB1Rs is maintained after inflammation.  
50 Depolarization-induced suppression of inhibition (DSI) in naïve animals is rapid and  
51 transient, but is prolonged in recordings after inflammation. Prolonged DSI is mediated  
52 by 2-arachidonoylglycerol (2-AG) indicating reduced monoacylglycerol lipase (MAGL)  
53 activity. These adaptations within the endogenous cannabinoid system have important  
54 implications for the development of future pain therapies targeting CB1Rs or MAGL.

55

56

57

58

59

60

61

62

## 63 **Introduction**

64           The cannabinoid 1 receptor (CB1R) is one of the most highly expressed GPCRs  
65 in the brain (Herkenham et al 1990) and is primarily localized to presynaptic terminals,  
66 where its activation inhibits neurotransmitter release (Katona et al 1999, Mikasova et al  
67 2008, Vaughan & Christie 2005, Vaughan et al 2000). CB1Rs are activated by  
68 endogenous cannabinoid ligands, endocannabinoids (eCBs) that negatively regulate  
69 synaptic transmission through on-demand synthesis, retrograde transport and activation  
70 of CB1Rs. eCB activation of CB1Rs is tightly controlled by enzymes responsible for  
71 eCB on-demand synthesis and rapid degradation (for review see Ahn et al 2008). The  
72 two most well studied eCBs are 2-arachidonylglycerol (2-AG) and anandamide (AEA).  
73 In the brain, levels of 2-AG are more than 100 times higher than AEA (Stella et al 1997).  
74 2-AG is regulated by the synthesis enzyme, diacylglycerol (DAGL; Bisogno et al 2003)  
75 and the catabolism enzyme, monoacylglycerol lipase (MAGL; Dinh et al 2002, Dinh et al  
76 2004). Through this endogenous cannabinoid system, eCBs and the CB1R regulate  
77 neurotransmitter release from the presynaptic terminal.

78           Expression of eCBs and their degradation enzymes are altered by inflammation  
79 in several brain areas (Vecchiarelli et al 2021). Our prior study demonstrated a  
80 reduction in CB1R suppression of GABA release that was the result of reduced protein  
81 expression in the rostral ventromedial medulla (RVM) with persistent inflammation (Li et  
82 al 2017). The RVM is integral to descending pain modulation and, along with the  
83 ventrolateral periaqueductal gray (vlPAG), constitutes the descending pain modulatory  
84 pathway. Within the vlPAG, CB1Rs are densely expressed (Wilson-Poe et al 2012) and  
85 their activation modulates neurotransmitter release in naïve animals (Aubrey et al 2017,

86 Drew et al 2009, Lau et al 2014, Vaughan et al 2000, Wilson-Poe et al 2015), but  
87 adaptations in the cannabinoid system after persistent inflammation in the vIPAG are  
88 not understood. Therefore, we sought to investigate how persistent hindpaw  
89 inflammation impacts cannabinoid regulation of GABA release within the vIPAG.

90         The present results describe an inflammation-induced increase in eCB levels in  
91 the vIPAG, leading to desensitization of CB1Rs by a GRK2/3-dependent mechanism.  
92 While this desensitization is clearly observed with exogenous agonists, endogenous  
93 release of 2-AG continues to induce CB1R-dependent suppression of inhibition after  
94 inflammation. Compared to naïve, the eCB-induced suppression is prolonged after  
95 persistent inflammation. Together, results show a distinction between CB1R activation  
96 by exogenous and endogenous cannabinoid ligands, as well as alteration in the  
97 endogenous cannabinoid system in the vIPAG after persistent inflammation. These  
98 adaptations have important implications for future therapeutic drug development.

99

100

101

102

103

104

105

106

107

108

109 **Results**

110 *Persistent inflammation reduces CB1R inhibition induced by exogenous agonists*

111 Plasticity within the cannabinoid system induced by persistent inflammation in the  
112 vIPAG was examined following Complete Freund's Adjuvant (CFA) injection into the  
113 hindpaw of male and female Sprague Dawley rats. All experiments were conducted 5-  
114 7d after CFA injection. Whole-cell patch clamp recordings of electrically evoked  
115 inhibitory postsynaptic currents (eIPSCs) were used to measure GABA IPSCs and the  
116 inhibition of GABA release by the non-selective cannabinoid receptor agonist, WIN-  
117 55,212-2 (WIN; 3  $\mu$ M). In tissue from naïve animals, WIN reduced eIPSC amplitudes by  
118  $57 \pm 5\%$  compared to baseline (Fig. 1A,B). CFA-induced inflammation significantly  
119 reduced WIN-mediated inhibition of eIPSCs to  $18 \pm 4\%$  (Fig. 1A,B). WIN inhibition was  
120 reversed by the CB1R selective antagonist, SR141716A (rimonabant, RIM; 3  $\mu$ M). No  
121 sex differences were observed in WIN-mediated suppression of GABA release in  
122 recordings from either naïve or CFA-treated rats (Fig. S1), so data from male and  
123 female rats were combined for all analyses. There were no differences in baseline  
124 eIPSC paired pulse ratios (unpaired t-test,  $t_{13}=0.59$ ;  $p=0.6$ ) or decay kinetics (unpaired  $t$ -  
125 test,  $t_{11} = 1.0$ ;  $p=0.3$ ) between recordings from naïve and CFA-treated animals.

126 To determine whether inflammation also affects spontaneous GABA release and  
127 the inhibition of spontaneous release by CB1Rs, we measured miniature IPSCs  
128 (mIPSCs) in the presence of tetrodotoxin (TTX; 500 nM). WIN suppressed mIPSC  
129 frequency by  $56 \pm 5\%$  in tissue from naïve animals and this effect was significantly  
130 reduced ( $14 \pm 6\%$ ) after persistent inflammation (Fig. 1C-F). Activating CB1Rs had no

131 effect on mIPSC amplitude (One-way ANOVA:  $F(1.1, 5.5)=0.43$ ;  $p=0.56$ ), consistent  
132 with a presynaptic effect of CB1R activation.

133 To determine whether the reduction in CB1R suppression of GABA release is  
134 due to a general change in presynaptic GPCR signaling or downstream signaling  
135 pathways, we investigated the effects of persistent inflammation on the cannabinoid 2  
136 receptor (CB2R) and presynaptic  $\mu$ -opioid receptor (MOR) inhibition of GABA release.  
137 The CB2R agonist, AM1241 (3  $\mu$ M) did not affect mIPSC frequency in vIPAG slices from  
138 naïve animals ( $14 \pm 4\%$  inhibition; Fig. 2A) and this was not changed after persistent  
139 inflammation ( $17 \pm 10\%$  inhibition; Figure 2A,B; unpaired t-test,  $t_{15}=0.71$ ;  $p=0.5$ ). While  
140 CB2R activation does not affect GABA release within the vIPAG, MOR activation  
141 suppresses GABA release to a similar extent in both naïve and CFA-treated slices. The  
142 MOR selective agonist DAMGO (1  $\mu$ M) inhibited eIPSCs to the same extent in slices  
143 from naïve and CFA-treated rats (Naïve:  $69 \pm 16\%$ ; CFA:  $66 \pm 23\%$ ; Fig. 2C,D).  
144 DAMGO-induced suppression of mIPSC frequency was also unaffected by persistent  
145 inflammation (naïve:  $64 \pm 12\%$ ; CFA:  $53 \pm 18\%$ ; Fig. 2E,F). Together, these data  
146 indicate that the effects of persistent inflammation are selective to the CB1R within the  
147 vIPAG.

148

#### 149 *Cannabinoid receptor expression is unchanged following persistent inflammation*

150 Persistent inflammation downregulates CB1R protein in the RVM (Li et al 2017),  
151 so we hypothesized that persistent inflammation downregulates CB1R expression in the  
152 vIPAG as well. Expression levels were measured using radioligand binding with [ $^3$ H]CP-  
153 55,940. Since this is a different ligand than previously used, we first replicated our

154 findings from Fig. 1 and found that CP-55,940 suppression of GABA release is  
155 significantly reduced after persistent inflammation (Naïve:  $50 \pm 5\%$ , CFA:  $4 \pm 4\%$ ; Fig.  
156 3A,B). Radioligand binding was then carried out using [ $^3\text{H}$ ]CP-55,940 in vIPAG  
157 dissected from naïve and CFA-treated. Surprisingly, there was no difference in total  
158 cannabinoid receptor binding (Fig. 3C; Naïve  $B_{\text{max}}$ :  $785 \pm 61$  fmol/mg; CFA  $B_{\text{max}}$ :  $708 \pm$   
159  $126$  fmol/mg) or the dissociation constant (Naïve  $K_d = 1.8 \pm 0.3$  nmol; CFA  $K_d = 1.7 \pm$   
160  $0.4$  nmol) in vIPAG tissue from naïve and CFA-treated animals. Similarly, persistent  
161 inflammation did not impact cannabinoid receptor binding in the dorsolateral striatum or  
162 hypothalamus (Fig. S2).

163

#### 164 *CB1Rs do not display acute desensitization to exogenous agonist*

165 The observation that total cannabinoid receptor binding was unchanged in slices  
166 from CFA-treated rats suggested that CB1Rs might be desensitized with persistent  
167 inflammation. Similar to other presynaptic GPCRs, CB1Rs do not desensitize during 30  
168 minutes of WIN ( $3 \mu\text{M}$ ; Fig. 4A). To test whether CB1Rs in the vIPAG desensitize with  
169 multiple hours of agonist exposure, slices containing vIPAG were incubated in WIN ( $3$   
170  $\mu\text{M}$ ) for 90 minutes up to 5.5 hours and RIM was used to determine the extent of  
171 inhibition by WIN over time. RIM increased eIPSC amplitudes similarly after 15 minutes  
172 of WIN ( $275 \pm 48\%$ ) or >1 hour of WIN ( $274 \pm 92\%$ ; Fig. 4B,C). These results indicate  
173 that CB1Rs are resistant to desensitization, even after several hours of WIN exposure.

174

175

176

177 *Persistent inflammation induces phosphorylation dependent CB1R desensitization*

178         Although CB1Rs are resistant to desensitization with acute agonist application  
179 over multiple hours (Fig. 4), it is possible that CB1R desensitization is induced by  
180 endogenous agonist(s) over the course of 5-7 days. A key step in canonical  
181 postsynaptic GPCR desensitization is G protein-coupled receptor kinase (GRK)  
182 phosphorylation of the GPCR C-terminal tail (Kovoor et al 1998, Lefkowitz 1993, Wang  
183 2000, Zhang et al 1998). To block this step, we incubated slices in Compound 101  
184 (Cmp101, 1  $\mu$ M,  $\geq$ 1 h), a potent and membrane permeable inhibitor of GRK 2/3 (Ikeda  
185 et al 2007, Thal et al 2011). Incubating slices in Cmp101 recovered CB1R suppression  
186 of GABA release after persistent inflammation (Fig. 5A;  $41 \pm 5\%$  inhibition compared to  
187 CFA vehicle:  $9 \pm 2\%$  inhibition). This result indicates that persistent inflammation  
188 induces GRK2/3-dependent desensitization of the presynaptic CB1R. We also tested  
189 Cmp101 (30  $\mu$ M) incubation on CB1R function (Adhikary et al 2022, Leff et al 2020,  
190 Lowe et al 2015) and found that Cmp101 increased CB1R function in a concentration-  
191 dependent manner (30  $\mu$ M incubation  $>$ 1h, WIN inhibition  $62 \pm 10\%$ ). Interestingly,  
192 GRK2/3 desensitization after persistent inflammation appears to be selective to the  
193 CB1R as presynaptic MOR suppression of GABA release after Cmp101 incubation is  
194 not different between slices from either naïve or CFA-treated rats (30  $\mu$ M; Fig. 5B).

195         The next experiments examined the role of eCB levels on the desensitization of  
196 CB1Rs after inflammation. GABAergic IPSCs were evoked and RIM (3  $\mu$ M) was applied  
197 to evaluate tonic activation of CB1Rs by eCBs. Consistent with previous findings in the  
198 vIPAG (Aubrey et al 2017), RIM did not consistently increase eIPSC amplitude in  
199 recordings from slices from naïve rats (paired t-test: baseline vs. RIM:  $t_{13}=1.54$ ;  $p=0.15$ ),



200 nor was there consistent eCB tone in slices from CFA-treated rats (paired t-test:  
201 baseline vs. RIM:  $t_{11}=1.13$ ;  $p=0.28$ ). Since inflammation induces CB1R desensitization,  
202 we hypothesized that eCB tone is masked by CB1R desensitization in rats treated with  
203 CFA. This was tested by incubating slices in Cmp101 prior to RIM superfusion. Cmp101  
204 incubation did not reveal eCB tone in slices from naïve animals (Fig. 5C; naïve drug  
205 free:  $13 \pm 5\%$  inhibition; naïve Cmp101:  $12 \pm 6\%$  inhibition) but revealed significant eCB  
206 tone in slices from CFA-treated animals, (Fig. 5C; CFA drug free:  $16 \pm 6\%$  inhibition;  
207 CFA Cmp101:  $37 \pm 6\%$  inhibition). RIM is an inverse agonist, so we also tested eCB  
208 tone with the CB1R neutral antagonist, NESS 0327 (NESS;  $0.5\mu\text{M}$ ) to determine if the  
209 increased eCB tone resulted from constitutive activity of the CB1R (Ruiu et al 2003).  
210 After Cmp101 incubation, NESS revealed eCB inhibition ( $40 \pm 8\%$ ;  $n=9$ ) which was  
211 similar to that produced by RIM ( $30 \pm 5\%$ ;  $n=5$ ). Thus, constitutive activity of CB1Rs  
212 does not account for the effect of the inverse agonist, RIM. A closer analysis of eIPSC  
213 kinetics revealed a decrease in eIPSC decay in recordings from CFA-treated rats,  
214 consistent with eCB modulation of vesicle release mode, changing multi-vesicular  
215 release to univesicular release in the vIPAG (Aubrey et al 2017). Even in the absence of  
216 Cmp101, RIM significantly increased eIPSC decay time in vIPAG slices from CFA-  
217 treated rats while it has no impact on decay in slices from naïve rats (Fig. 5D).

218

### 219 *Persistent inflammation prolongs 2-AG signaling in the vIPAG*

220 With evidence that eCBs change eIPSC decay kinetics in the absence of  
221 Cmp101 (Fig. 5D), it appeared that eCBs activate CB1Rs even though the majority are  
222 desensitized after persistent inflammation (Fig. 5A). We used depolarization-induced

223 suppression of inhibition (DSI) to directly examine eCB activation of CB1Rs. The DSI  
224 protocol (+20mV for 5 seconds; (Wamsteeker et al 2010)) induced a rapid and transient  
225 suppression of presynaptic GABA release in a subset of PAG neurons (Fig. 6A). This  
226 suppression was blocked by the CB1R antagonist NESS (0.5  $\mu$ M; Fig. 6A), indicating  
227 that DSI induces CB1R activation in the vIPAG. In slices from CFA-treated rats, we  
228 observed prolonged DSI (Fig. 6B) that was also blocked by NESS (Fig. 6B). The  
229 prolonged time course was analyzed by measuring the maximal percent inhibition  
230 immediately following depolarization (max DSI) and 30 s later (late DSI; Fig. 6C). Max  
231 DSI in recordings from naïve rats is  $41 \pm 6\%$  is similar to  $37 \pm 4\%$  in recordings from  
232 CFA-treated rats. The eIPSCs from naïve slices return close to baseline ( $14 \pm 5\%$   
233 inhibition) but did not recover in 30 s ( $37 \pm 5\%$ ) in recordings from CFA treated rats (Fig.  
234 6C). In addition to prolonged DSI, the proportion of experiments that yield DSI after  
235 depolarization is significantly increased (Fig. 6D) in recordings from CFA treated rats  
236 (16 out of 19 cells exhibited DSI) compared to recordings from naïve rats (10 out of 24  
237 cells exhibited DSI). In the remaining neurons, the DSI protocol had no effect on eIPSC  
238 amplitude (Fig. S3A).

239 DSI is dependent on 2-AG signaling in other brain regions and can be prolonged  
240 by inhibiting 2-AG degradation (Hashimotodani et al 2007, Straiker & Mackie 2005). To  
241 determine the effects of prolonging 2-AG levels in vIPAG, slices from naïve rats were  
242 incubated in the 2-AG degradation inhibitor, JZL184 (1 $\mu$ M) for at least one hour (Lau et  
243 al 2014, Long et al 2009)). Incubation with JZL184 prolonged DSI and recapitulated the  
244 DSI time course observed in recordings from CFA-treated rats (Fig. 6E,F). Interestingly,  
245 JZL184 incubation did not change the proportion of cells that exhibit DSI (Fig. S3B). DSI

246 after CFA is completely blocked by inhibiting 2-AG synthesis with incubation in the  
247 DAGL $\alpha$  inhibitor, DO34 (Fig. 6G; 1 $\mu$ M; >1h). Together, these data indicate that CFA-  
248 induced inflammation increases 2-AG levels in the vIPAG.

249

250

251

252

253

254

255

256

257

258

259

260

261

262

263

264

265

266

267

268

## 269 **Discussion**

270 Here, we describe a mechanism by which persistent inflammation induces  
271 adaptations in the endogenous cannabinoid system. Inflammation promotes  
272 desensitization of presynaptic CB1Rs that suppress GABA release in the vIPAG. This  
273 desensitization is dependent on CB1R and GRK2/3 activity and is recovered in the  
274 presence of the GRK2/3 inhibitor, Cmp101. Cmp101 also reveals an underlying  
275 increase in tonic activation of CB1Rs by eCBs 5-7 days after CFA injection. Despite  
276 these adaptations, desensitization does not affect maximal CB1R activation by eCBs,  
277 but actually prolongs CB1R activation by depolarization-induced eCB release in CFA-  
278 treated rats. These data have important implications for the development of  
279 pharmaceuticals targeting the cannabinoid system for inflammatory diseases.

280 Our data show direct evidence of GRK2/3-dependent desensitization of  
281 presynaptic CB1Rs. While postsynaptic GPCRs readily desensitize and internalize in  
282 response to agonist exposure (Williams et al 2013), it is well established that  
283 presynaptic GPCRs are resistant to desensitization (Fyfe et al 2010, Pennock et al  
284 2012, Pennock & Hentges 2011, Pennock & Hentges 2016, Wetherington & Lambert  
285 2002). Sustained signaling from presynaptic receptors during prolonged agonist  
286 exposure may be due to multiple mechanisms. One such mechanism involves protein-  
287 protein interactions with presynaptic scaffold proteins that immobilize the receptors  
288 close to the plasma membrane, as observed for presynaptic GABA<sub>B</sub> receptors (Boudin  
289 et al 2000, Laviv et al 2011, Vargas et al 2008, Vigot et al 2006). An alternative  
290 mechanism, observed for presynaptic MORs, describes presynaptic GPCRs  
291 internalizing into endosomes in response to agonist stimulation, but maintaining

292 signaling through rapid receptor replacement by a pool of receptors that diffuse laterally  
293 through axon membranes (Jullie et al 2020). Both mechanisms result in sustained  
294 GPCR signaling from presynaptic terminals. CB1Rs exhibit rapid mobility through the  
295 synapse under basal conditions; however, in contrast to MOR regulation, prolonged  
296 agonist exposure significantly reduces CB1R mobility and expression of CB1Rs in the  
297 synapse (Mikasova et al 2008). We demonstrated that CB1Rs are also resistant to  
298 desensitization under normal conditions but are desensitized after persistent  
299 inflammation, in contrast to presynaptic MORs which were unaffected by inflammation.  
300 Differences in CB1R and MOR regulation and mobility could underly their differential  
301 desensitization after persistent inflammation.

302 CB1R desensitization in response to prolonged administration of exogenous  
303 agonists, such as tetrahydrocannabinol ( $\Delta^9$ -THC) or WIN, has been reported by many  
304 groups (Breivogel et al 1999, Kouznetsova et al 2002, Lazenka et al 2014, Rubino et al  
305 2000, Sim et al 1996). Long-term increases in eCBs also induce CB1R desensitization  
306 (Imperatore et al 2015, Kinsey et al 2013, Long et al 2009, Navia-Paldanius et al 2015,  
307 Schlosburg et al 2010). eCB levels in the PAG are increased almost immediately after  
308 acute inflammation induced by formalin injection into the hindpaw (Walker et al 1999) as  
309 well as after 7 days of chronic constriction injury, a model of neuropathic pain (Petrosino  
310 et al 2007). The observed CB1R desensitization in our study is likely a result of  
311 increased CB1R-induced G protein signaling within the vIPAG early in inflammation  
312 (Wilson-Poe et al 2021).

313 We observed prolonged DSI after persistent inflammation, which is consistent  
314 with the time course in other studies pharmacologically or genetically inhibiting MAGL

315 (Chen et al 2016, Pan et al 2009, Schlosburg et al 2010, Straiker & Mackie 2005). We  
316 show that the prolonged inhibition of GABAergic IPSCs following DSI in slices from  
317 CFA-treated rats is blocked by inhibiting DAGL $\alpha$ , the enzyme responsible for 2-AG  
318 synthesis, implicating 2-AG in the adaptations induced by CFA in the vIPAG. The  
319 prolonged time course could be the result of increased synthesis or decreased activity  
320 or levels of the degradation enzyme, MAGL. Since we observe a comparable maximal  
321 effect of DSI in recordings from both naïve and CFA-treated rats, suggesting  
322 comparable levels of 2-AG synthesis, we hypothesize that MAGL activity is diminished  
323 following persistent inflammation. Under normal conditions in the vIPAG, MAGL  
324 catabolizes 2-AG quickly enough that washing 2-AG over the slice does not suppress  
325 GABA release unless MAGL is blocked (Lau et al 2014). Consistent with this  
326 interpretation, experiments using MAGL knockout mice or pharmacological inhibition of  
327 MAGL show increases in 2-AG signaling that lead to CB1R desensitization (Imperatore  
328 et al 2015, Kinsey et al 2013, Long et al 2009, Navia-Paldanius et al 2015, Schlosburg  
329 et al 2010). However, if alterations in MAGL degradation of 2-AG are the sole  
330 mechanism underlying these adaptations in CFA-treated rats, we expected inhibiting  
331 MAGL activity with JZL184 would also increase the proportion of neurons in naïve rats  
332 that displayed DSI. This was not the case suggesting that CFA treatment may also  
333 affect synthesis in neurons that do not readily display DSI or diffusion of eCBs within the  
334 vIPAG. Therefore, reductions in MAGL degradation of 2-AG play a role but other  
335 mechanisms may be also involved in inflammation-induced adaptations in the  
336 cannabinoid system.

337           These results also highlight differences in signaling between exogenous and  
338 endogenous cannabinoids following persistent inflammation. Desensitization of CB1Rs  
339 clearly diminishes effects of exogenous cannabinoid agonists but eCBs continue to  
340 activate CB1Rs and induce prolonged suppression of GABA release, even though the  
341 majority of CB1Rs are desensitized. Similar reductions in exogenous but not  
342 endogenous ligand-mediated CB1R suppression of GABA release have been observed  
343 after chronic stress paradigms (Patel et al 2009). Importantly, this indicates that eCBs  
344 synthesized through DSI protocols are coupled more effectively to effectors and may  
345 indicate spare receptors in synapses. Alternatively, eCBs target different signaling  
346 pathways. Further studies are necessary to understand the consequences of long-term  
347 alterations in eCB synthesis and CB1R desensitization.

348

#### 349 *Physiological Relevance*

350           Direct microinjections of cannabinoid agonists into the PAG induce  
351 antinociception (Lichtman et al 1996, Martin et al 1995, Wilson et al 2008, Wilson-Poe  
352 et al 2013) through activation of CB1Rs that inhibit GABA release in the PAG (Vaughan  
353 et al 2000). Recent work has highlighted MAGL inhibitors as analgesic therapeutic  
354 options (Anderson et al 2014, Curry et al 2018, Della Pietra et al 2021, Diester et al  
355 2021, Ignatowska-Jankowska et al 2015) but the data presented here suggest that  
356 MAGL inhibition may not be a viable strategy if inflammation impairs MAGL function and  
357 desensitizes CB1Rs. However, systemic administration of MAGL inhibitors, as well as  
358 fatty acid hydrolase (FAAH) inhibitors and combinations of the two, increase levels of  
359 the eCBs 2-AG and anandamide and result in anti-hyperalgesia in both neuropathic and

360 inflammatory pain models (Anderson et al 2014, Jayamanne et al 2006, Mitchell et al  
361 2005). In addition, the anti-hyperalgesic effects of systemic cannabinoid agonist,  $\Delta^9$ -  
362 THC (Craft et al 2013, Smith et al 1998, Sofia et al 1973), and WIN (Bridges et al 2001,  
363 Herzberg et al 1997, Li et al 1999) are not altered in similar inflammatory or neuropathic  
364 pain models, suggesting either that the reduced functional CB1Rs in the vIPAG are  
365 sufficient for cannabinoid-induced analgesia or that CB1Rs in the vIPAG are not  
366 required. One intriguing possibility is that inflammation-induced increases in 2-AG  
367 contribute to hyperalgesia and CB1R desensitization is a compensatory response that  
368 protects synapses. Indeed, there is precedent for cannabinoids to contribute to  
369 hyperalgesia (Dunford et al 2021, Khasabova et al 2022). Understanding the behavioral  
370 consequences of this altered cannabinoid signaling within the vIPAG after persistent  
371 inflammation, the generalizability to other brain areas, and the reversibility of this  
372 process have important implications for future drug development.

373

374

375

376

377

378

379

380

381

382



## 383 **Materials and Methods**

### 384 *Animals*

385 Adult male and female Sprague Dawley rats (Harlan Laboratories and bred in-house;  
386 postnatal day 30-90) were used for all experiments. All procedures were performed in  
387 strict accordance with the *Guide for the Care and Use of Laboratory Animals* as  
388 adopted by the Institutional Animal Care and Use Committee of Oregon Health &  
389 Science University. Care was taken to minimize discomfort.

390

### 391 *Inflammation*

392 Complete Freund's Adjuvant (CFA: heat-killed *Mycobacterium tuberculosis* in mineral  
393 oil, 1 mg/ml, 0.1 ml volume injected, Sigma-Aldrich) was injected subcutaneously into  
394 the plantar surface of the right hindpaw. The CFA injection produces an intense tissue  
395 inflammation of the hindpaw characterized by erythema, edema, and hyperalgesia  
396 (Iadarola et al 1988). Electrophysiological recordings and tissue dissections were  
397 performed 5-7d following CFA injection.

398

### 399 *vIPAG slice preparation*

400 vIPAG slices were prepared as previously described (Tonsfeldt et al 2016). Rats were  
401 deeply anesthetized with isoflurane and the brain was rapidly removed and placed in  
402 ice-cold sucrose-based cutting buffer containing the following (in mM): 75 NaCl, 2.5 KCl,  
403 0.1 CaCl<sub>2</sub>, 6 MgSO<sub>4</sub>, 1.2 NaH<sub>2</sub>PO<sub>4</sub>, 25 NaHCO<sub>3</sub>, 2.5 dextrose, 80 sucrose. Ventrolateral  
404 PAG (vIPAG) slices were cut to a thickness of 220 μm on a vibrotome (Leica  
405 Microsystems) in sucrose-based cutting buffer and transferred to a holding chamber

406 with aCSF containing the following (in mM): 126 NaCl, 21.4 NaHCO<sub>3</sub>, 22 dextrose, 2.5  
407 KCl, 2.4 CaCl<sub>2</sub>, 1.2 MgCl<sub>2</sub>, 1.2 NaH<sub>2</sub>PO<sub>4</sub> and the osmolarity was adjusted to 300-310  
408 mOsm. Slices were maintained with 95% O<sub>2</sub>- and 5% CO<sub>2</sub>-oxygenated until transfer to a  
409 recording chamber on an Olympus BX51WI upright microscope and superfused with  
410 aCSF maintained at 32°C.

411

#### 412 *Whole-cell patch-clamp recordings*

413 Voltage-clamp recordings (holding potential -70 mV) were made in whole-cell  
414 configuration using an Axopatch 200B amplifier (Molecular Devices). Patch-clamp  
415 electrodes were pulled from borosilicate glass (1.5 mm diameter; WPI) on a two-stage  
416 puller (PP83, Narishige). Pipettes had a resistance of 2.5-5 MΩ. IPSCs were recorded  
417 in an intracellular pipette solution containing the following (in mM): 140 CsCl, 10  
418 HEPES, 4 MgATP, 3 NaGTP, 1 EGTA, 1 MgCl<sub>2</sub>, 0.3 CaCl<sub>2</sub>, pH adjusted to 7.3 with  
419 CsOH, 290-300 mOsm. QX314 (100 μM) was added to the internal solution for eIPSC  
420 experiments to reduce action potentials in the recording cell. Access resistance was  
421 continuously monitored. Recordings in which access resistance changed by >20%  
422 during the experiment were excluded from data analysis. A junction potential of -5mV  
423 was corrected during recording. GABAergic events were isolated in the presence of  
424 glutamate receptor antagonist NBQX (5 μM). Spontaneous miniature IPSCs (mIPSCs)  
425 were recorded in the presence of TTX (500 nM). Events were low-pass filtered at 2 kHz  
426 and sampled at 10-20 kHz for off-line analysis (Axograph 1.7.6) and individual events  
427 were visually confirmed. In experiments using exogenous cannabinoid agonists, one  
428 neuron was recorded per slice due to the lipophilic nature of cannabinoid receptor

429 drugs. After each experiment with exogenous cannabinoid agonists or antagonists, lines  
430 were washed with 50% EtOH. Each set of experiments was repeated using at least 3  
431 distinct rats with no more than 2 cells from a single rat included in a specific dataset.

432

### 433 *Drugs*

434 WIN55,212-2 (Caymen Chemicals), SR141716A (rimonabant; RIM; Caymen Chemical),  
435 and NESS (Tocris) were dissolved in DMSO, aliquoted, and stored at -20°C. CP55,940  
436 and AM251 (Caymen Chemical Company) were dissolved in methanol and stored at -  
437 20°C. DMSO and methanol at appropriate concentrations were used as vehicle  
438 controls. 2,3-dihydroxy-6-nitro-7-sulphamoyl-benzo(F)quinoxaline (NBQX; (Sheardown  
439 et al 1990)), [D-Ala<sup>2</sup>, N-MePhe<sup>4</sup>, Gly-ol]-enkephalin (DAMGO), Naloxone and  
440 tetrodotoxin (TTX) were purchased from Abcam, dissolved in distilled water, and stored  
441 at 4°C. CMP101 (3- [(4-methyl-5- pyridin-4-yl-1,2,4-triazol-3-yl)methylamino]-N-[[2-  
442 (trifluoromethyl) phenyl]methyl]benzamide hydrochloride) was purchased from Hello Bio  
443 and prepared as described previously (Leff et al 2020). Briefly, Cmp101 (made fresh  
444 daily) was first dissolved in a small amount of DMSO (10% of final volume), sonicated,  
445 then brought to its final volume with 20% (2-Hydroxypropyl)- $\beta$ -cyclo-dextrin (HPCD;  
446 Sigma-Aldrich) and sonicated again to create a 10mM solution. For experiments using a  
447 higher concentration of Cmp101, Cmp101 was applied to the slice as follows: 30 $\mu$ M  
448 incubation for >1h, 1 $\mu$ M maintenance while patching, 10 $\mu$ M in drug tubes (Adhikary et al  
449 2022, Leff et al 2020, Lowe et al 2015). For experiments using a lower concentration of  
450 Cmp101, [1 $\mu$ M] was used for incubation (>1h), maintenance while patching, and in drug  
451 tubes. DMSO and 20% HPCD were used as the vehicle control.

452

453 *Radioligand Binding Assay – tissue dissection*

454 Rats were deeply anesthetized with isoflurane, brains were removed and submerged in  
455 ice cold Tris-HCl buffer (pH=7.4 at 4°C). Over ice, the brain was sectioned into 1mm  
456 slices from which the vIPAG, DLS and hypothalamus were dissected and immediately  
457 flash frozen on dry ice. Tissue samples were stored at -80°C.

458

459 *Radioligand Binding Assay- total particulate tissue preparation*

460 Tissue preparation was adapted from (Eastwood et al 2018). Since brain regions  
461 sampled are so small, tissue from each brain region from multiple animals (8 vIPAG, 2  
462 DLS, 2 hypothalamus) was pooled to ensure ample protein levels for saturation binding.  
463 Tissue was removed from -80°C and transferred to 2 ml tube containing 0.5 ml Tris-HCl  
464 (pH 7.4 at 4C) with protease inhibitor (EMD Millipore; protease inhibitor cocktail set  
465 #539134). Tissue was homogenized with a polytron PT1200E 4 x 6s, placing sample on  
466 ice for 20s between homogenizations. The polytron was washed with water between  
467 each sample. The volume was increased to 1.5ml, then the sample was transferred to a  
468 mini-centrifuge and spun at 13,000 x g for 20 min at 4°C. The supernatant was  
469 discarded and pellet was resuspended in 0.5ml Tris-HCl with protease inhibitor. Tissue  
470 was homogenized for 7s and spun as described above once more. After the final spin,  
471 the supernatant was discarded, the pellet was resuspended in TME Binding Buffer (200  
472 mM Tris Base, 50mM MgCl<sub>2</sub>, 10mM EDTA, pH=8.0) with protease inhibitor and  
473 homogenized for 10s. TME with protease inhibitor was added for a final volume of

474 1.5ml. Samples were kept on ice throughout the preparation. Protein levels were  
475 determined with the BCA Protein Assay Kit (Thermo Fisher Scientific, Waltham, MA).

476

#### 477 *Radioligand Binding Assay- Saturation Curve*

478 Binding assays were conducted in the absence of Na<sup>+</sup>. [<sup>3</sup>H]CP-55,940 was used to  
479 measure cannabinoid receptor binding (Catani & Gasperi 2016, Chanda et al 2010,  
480 Freels et al 2020, Hill et al 2008, McLaughlin et al 2013, Romero et al 1995). Binding  
481 assays were conducted using 5 concentrations [<sup>3</sup>H]CP-55,940 (0.1-7nM) in a final  
482 volume of 1 ml. Assays were performed in duplicate in a 96-well plate with 50 mM TME  
483 binding buffer with bovine serum albumin (BSA; 1mg/ml; pH 7.4 at 30°C). Nonspecific  
484 binding was subtracted from total binding to yield specific binding. Nonspecific binding  
485 was determined with 1μM WIN55,212-2 and was 59%, 19%, or 55% in naïve and 53%,  
486 17%, or 55% in CFA in vIPAG, DLS, and hypothalamus, respectively. Prepared  
487 membranes were incubated with [<sup>3</sup>H]CP-55,940 at 30°C for 60 min. The incubation was  
488 terminated using a Tomtec cell harvester (Hamden, CT) by rapid filtration through  
489 Perkin Elmer Filtermat A filters presoaked in 0.2% polyethylenimine. The filters were  
490 dried, spotted with scintillation cocktail, and radioactivity was determined using a Perkin  
491 Elmer microBetaplate 1405 scintillation counter.

492

#### 493 *Data Analysis*

494 In all electrophysiological experiments, each dataset included recordings from at least 3  
495 rats. For DSI experiments, “Max DSI” averaged the first 4 eIPSCs after depolarization  
496 and “Late DSI” averaged eIPSCs 30-45 seconds after depolarization. In radioligand

497 binding experiments, 3 replicates per group were run. All analysis were conducted in  
498 Graphpad Prism 9 (Prism version 9.2; San Diego, CA). Values are presented as mean  $\pm$   
499 SE and all data points are shown in bar graphs to illustrate variability. Statistical  
500 comparisons were made using two-tailed paired or unpaired T-test, one-way ANOVA, or  
501 two-way ANOVA when appropriate. In all summary bar graphs, each dot represents an  
502 individual cell while the numbers in the bars represent the animal number. When post-  
503 hoc analysis was appropriate Tukey test and Šidák's multiple comparisons tests were  
504 used.  $P < 0.05$  was used.

505

## 506 **Acknowledgments**

507 We would like to thank Dr. Amy Eshleman for her expertise and guidance with  
508 radioligand binding assays. We also thank Dr. John Williams and Dr. Sweta Adhikary for  
509 help with the Cmp101 experiments. We thank members of the Ingram laboratory, as  
510 well as Dr. Mary Heinricher and her laboratory, for valuable discussion and suggestions.  
511 Work was supported by funding from NIH R01DA042565 (S.L.I.), C.A.B. supported by  
512 research grants from the NIH/NIDA (F31 DA052114 and T32 DA007262). This work  
513 was supported by funding to AJ from NIH/NIDA (ADA20003-001-00002), from the US  
514 Drug Enforcement Administration (D-20-OD-00), from the US Food and Drug  
515 Administration (CDER-20-I-0546), and from the Department of Veterans Affairs  
516 Research Career Scientist Program (1IK6BX005754).

517

518

519

520 **Author Contributions**

521 C.A.B. performed experiments and C.A.B. and S.L.I. conceived of the experiments,  
522 analyzed the data and wrote the manuscript. A.J. provided essential reagents,  
523 equipment, and helped with analysis of radioligand binding assays.

524

525 **Declaration of interests**

526 The authors declare no competing interests.

## 527 **References**

528

- 529 Adhikary S, Koita O, Lebowitz JJ, Birdsong WT, Williams JT. 2022. Agonist specific  
530 regulation of G protein-coupled receptors after chronic opioid treatment. *Mol*  
531 *Pharmacol*
- 532 Ahn K, McKinney MK, Cravatt BF. 2008. Enzymatic pathways that regulate  
533 endocannabinoid signaling in the nervous system. *Chem Rev* 108: 1687-707
- 534 Anderson WB, Gould MJ, Torres RD, Mitchell VA, Vaughan CW. 2014. Actions of the  
535 dual FAAH/MAGL inhibitor JZL195 in a murine inflammatory pain model.  
536 *Neuropharmacology* 81: 224-30
- 537 Aubrey KR, Drew GM, Jeong HJ, Lau BK, Vaughan CW. 2017. Endocannabinoids  
538 control vesicle release mode at midbrain periaqueductal grey inhibitory  
539 synapses. *J Physiol* 595: 165-78
- 540 Bisogno T, Howell F, Williams G, Minassi A, Cascio MG, et al. 2003. Cloning of the first  
541 sn1-DAG lipases points to the spatial and temporal regulation of  
542 endocannabinoid signaling in the brain. *J Cell Biol* 163: 463-8
- 543 Boudin H, Doan A, Xia J, Shigemoto R, Huganir RL, et al. 2000. Presynaptic clustering of  
544 mGluR7a requires the PICK1 PDZ domain binding site. *Neuron* 28: 485-97
- 545 Breivogel CS, Childers SR, Deadwyler SA, Hampson RE, Vogt LJ, Sim-Selley LJ. 1999.  
546 Chronic delta9-tetrahydrocannabinol treatment produces a time-dependent loss  
547 of cannabinoid receptors and cannabinoid receptor-activated G proteins in rat  
548 brain. *J Neurochem* 73: 2447-59
- 549 Bridges D, Ahmad K, Rice AS. 2001. The synthetic cannabinoid WIN55,212-2  
550 attenuates hyperalgesia and allodynia in a rat model of neuropathic pain. *Br J*  
551 *Pharmacol* 133: 586-94
- 552 Catani VM, Gasperi V. 2016. Assay of CB1 Receptor Binding. *Methods Mol Biol* 1412:  
553 41-55
- 554 Chanda PK, Gao Y, Mark L, Btsh J, Strassle BW, et al. 2010. Monoacylglycerol lipase  
555 activity is a critical modulator of the tone and integrity of the endocannabinoid  
556 system. *Mol Pharmacol* 78: 996-1003
- 557 Chen Y, Liu X, Vickstrom CR, Liu MJ, Zhao L, et al. 2016. Neuronal and Astrocytic  
558 Monoacylglycerol Lipase Limit the Spread of Endocannabinoid Signaling in the  
559 Cerebellum. *eNeuro* 3
- 560 Craft RM, Kandasamy R, Davis SM. 2013. Sex differences in anti-allodynic, anti-  
561 hyperalgesic and anti-edema effects of Delta(9)-tetrahydrocannabinol in the rat.  
562 *Pain* 154: 1709-17
- 563 Curry ZA, Wilkerson JL, Bagdas D, Kyte SL, Patel N, et al. 2018. Monoacylglycerol  
564 Lipase Inhibitors Reverse Paclitaxel-Induced Nociceptive Behavior and  
565 Proinflammatory Markers in a Mouse Model of Chemotherapy-Induced  
566 Neuropathy. *J Pharmacol Exp Ther* 366: 169-83
- 567 Della Pietra A, Giniatullin R, Savinainen JR. 2021. Distinct Activity of Endocannabinoid-  
568 Hydrolyzing Enzymes MAGL and FAAH in Key Regions of Peripheral and  
569 Central Nervous System Implicated in Migraine. *Int J Mol Sci* 22
- 570 Diester CM, Lichtman AH, Negus SS. 2021. Behavioral Battery for Testing Candidate  
571 Analgesics in Mice. II. Effects of Endocannabinoid Catabolic Enzyme Inhibitors  
572 and  $\Delta 9$ -Tetrahydrocannabinol. *J Pharmacol Exp Ther* 377: 242-53



- 573 Dinh TP, Carpenter D, Leslie FM, Freund TF, Katona I, et al. 2002. Brain monoglyceride  
574 lipase participating in endocannabinoid inactivation. *Proc Natl Acad Sci U S A* 99:  
575 10819-24
- 576 Dinh TP, Kathuria S, Piomelli D. 2004. RNA interference suggests a primary role for  
577 monoacylglycerol lipase in the degradation of the endocannabinoid 2-  
578 arachidonoylglycerol. *Mol Pharmacol* 66: 1260-4
- 579 Drew GM, Lau BK, Vaughan CW. 2009. Substance P drives endocannabinoid-mediated  
580 disinhibition in a midbrain descending analgesic pathway. *J Neurosci* 29: 7220-9
- 581 Dunford J, Lee AT, Morgan MM. 2021. Tetrahydrocannabinol (THC) Exacerbates  
582 Inflammatory Bowel Disease in Adolescent and Adult Female Rats. *J Pain* 22:  
583 1040-47
- 584 Eastwood EC, Eshleman AJ, Janowsky A, Phillips TJ. 2018. Verification of a genetic  
585 locus for methamphetamine intake and the impact of morphine. *Mamm Genome*  
586 29: 260-72
- 587 Freels TG, Baxter-Potter LN, Lugo JM, Glodosky NC, Wright HR, et al. 2020. Vaporized  
588 Cannabis Extracts Have Reinforcing Properties and Support Conditioned Drug-  
589 Seeking Behavior in Rats. *J Neurosci* 40: 1897-908
- 590 Fyfe LW, Cleary DR, Macey TA, Morgan MM, Ingram SL. 2010. Tolerance to the  
591 antinociceptive effect of morphine in the absence of short-term presynaptic  
592 desensitization in rat periaqueductal gray neurons. *J Pharmacol Exp Ther* 335:  
593 674-80
- 594 Hashimotodani Y, Ohno-Shosaku T, Kano M. 2007. Presynaptic monoacylglycerol  
595 lipase activity determines basal endocannabinoid tone and terminates retrograde  
596 endocannabinoid signaling in the hippocampus. *J Neurosci* 27: 1211-9
- 597 Herkenham M, Lynn AB, Little MD, Johnson MR, Melvin LS, et al. 1990. Cannabinoid  
598 receptor localization in brain. *Proc Natl Acad Sci U S A* 87: 1932-6
- 599 Herzberg U, Eliav E, Bennett GJ, Kopin IJ. 1997. The analgesic effects of R(+)-WIN  
600 55,212-2 mesylate, a high affinity cannabinoid agonist, in a rat model of  
601 neuropathic pain. *Neurosci Lett* 221: 157-60
- 602 Hill MN, Carrier EJ, Ho WS, Shi L, Patel S, et al. 2008. Prolonged glucocorticoid  
603 treatment decreases cannabinoid CB1 receptor density in the hippocampus.  
604 *Hippocampus* 18: 221-6
- 605 Iadarola MJ, Brady LS, Draisci G, Dubner R. 1988. Enhancement of dynorphin gene  
606 expression in spinal cord following experimental inflammation: stimulus  
607 specificity, behavioral parameters and opioid receptor binding. *Pain* 35: 313-26
- 608 Ignatowska-Jankowska B, Wilkerson JL, Mustafa M, Abdullah R, Niphakis M, et al.  
609 2015. Selective monoacylglycerol lipase inhibitors: antinociceptive versus  
610 cannabimimetic effects in mice. *J Pharmacol Exp Ther* 353: 424-32
- 611 Ikeda S, Keneko M, Fujiwara S. 2007. Cardiotonic agent comprising GRK inhibitor. *US*  
612 *Patent*
- 613 Imperatore R, Morello G, Luongo L, Taschler U, Romano R, et al. 2015. Genetic  
614 deletion of monoacylglycerol lipase leads to impaired cannabinoid receptor  
615 CB(1)R signaling and anxiety-like behavior. *J Neurochem* 135: 799-813
- 616 Jayamanne A, Greenwood R, Mitchell VA, Aslan S, Piomelli D, Vaughan CW. 2006.  
617 Actions of the FAAH inhibitor URB597 in neuropathic and inflammatory chronic  
618 pain models. *Br J Pharmacol* 147: 281-8

- 619 Jullie D, Stoeber M, Sibarita JB, Zieger HL, Bartol TM, et al. 2020. A Discrete  
620 Presynaptic Vesicle Cycle for Neuromodulator Receptors. *Neuron* 105: 663-77  
621 e8
- 622 Katona I, Sperlagh B, Sik A, Kafalvi A, Vizi ES, et al. 1999. Presynaptically located CB1  
623 cannabinoid receptors regulate GABA release from axon terminals of specific  
624 hippocampal interneurons. *J Neurosci* 19: 4544-58
- 625 Khasabova IA, Gable J, Johns M, Khasabov SG, Kalyuzhny AE, et al. 2022. Inhibition of  
626 DAGL $\beta$  as a therapeutic target for pain in sickle cell disease. *Haematologica*
- 627 Kinsey SG, Wise LE, Ramesh D, Abdullah R, Selley DE, et al. 2013. Repeated low-  
628 dose administration of the monoacylglycerol lipase inhibitor JZL184 retains  
629 cannabinoid receptor type 1-mediated antinociceptive and gastroprotective  
630 effects. *J Pharmacol Exp Ther* 345: 492-501
- 631 Kouznetsova M, Kelley B, Shen M, Thayer SA. 2002. Desensitization of cannabinoid-  
632 mediated presynaptic inhibition of neurotransmission between rat hippocampal  
633 neurons in culture. *Mol Pharmacol* 61: 477-85
- 634 Kovoor A, Celver JP, Wu A, Chavkin C. 1998. Agonist induced homologous  
635 desensitization of mu-opioid receptors mediated by G protein-coupled receptor  
636 kinases is dependent on agonist efficacy. *Mol Pharmacol* 54: 704-11
- 637 Lau BK, Drew GM, Mitchell VA, Vaughan CW. 2014. Endocannabinoid modulation by  
638 FAAH and monoacylglycerol lipase within the analgesic circuitry of the  
639 periaqueductal grey. *Br J Pharmacol* 171: 5225-36
- 640 Laviv T, Vertkin I, Berdichevsky Y, Fogel H, Riven I, et al. 2011. Compartmentalization  
641 of the GABAB receptor signaling complex is required for presynaptic inhibition at  
642 hippocampal synapses. *J Neurosci* 31: 12523-32
- 643 Lazenka MF, David BG, Lichtman AH, Nestler EJ, Selley DE, Sim-Selley LJ. 2014.  
644 Delta FosB and AP-1-mediated transcription modulate cannabinoid CB<sub>1</sub> receptor  
645 signaling and desensitization in striatal and limbic brain regions. *Biochem*  
646 *Pharmacol* 91: 380-9
- 647 Leff ER, Arttamangkul S, Williams JT. 2020. Chronic Treatment with Morphine Disrupts  
648 Acute Kinase-Dependent Desensitization of GPCRs. *Mol Pharmacol* 98: 497-507
- 649 Lefkowitz RJ. 1993. G protein-coupled receptor kinases. *Cell* 74: 409-12
- 650 Li J, Daughters RS, Bullis C, Bengiamin R, Stucky MW, et al. 1999. The cannabinoid  
651 receptor agonist WIN 55,212-2 mesylate blocks the development of hyperalgesia  
652 produced by capsaicin in rats. *Pain* 81: 25-33
- 653 Li MH, Suchland KL, Ingram SL. 2017. Compensatory Activation of Cannabinoid CB2  
654 Receptor Inhibition of GABA Release in the Rostral Ventromedial Medulla in  
655 Inflammatory Pain. *J Neurosci* 37: 626-36
- 656 Lichtman AH, Cook SA, Martin BR. 1996. Investigation of brain sites mediating  
657 cannabinoid-induced antinociception in rats: evidence supporting periaqueductal  
658 gray involvement. *J Pharmacol Exp Ther* 276: 585-93
- 659 Long JZ, Li W, Booker L, Burston JJ, Kinsey SG, et al. 2009. Selective blockade of 2-  
660 arachidonoylglycerol hydrolysis produces cannabinoid behavioral effects. *Nat*  
661 *Chem Biol* 5: 37-44
- 662 Lowe JD, Sanderson HS, Cooke AE, Ostovar M, Tsisanova E, et al. 2015. Role of G  
663 Protein-Coupled Receptor Kinases 2 and 3 in mu-Opioid Receptor  
664 Desensitization and Internalization. *Mol Pharmacol* 88: 347-56

- 665 Martin WJ, Patrick SL, Coffin PO, Tsou K, Walker JM. 1995. An examination of the  
666 central sites of action of cannabinoid-induced antinociception in the rat. *Life Sci*  
667 56: 2103-9
- 668 McLaughlin RJ, Hill MN, Dang SS, Wainwright SR, Galea LA, et al. 2013. Upregulation  
669 of CB<sub>1</sub> receptor binding in the ventromedial prefrontal cortex promotes proactive  
670 stress-coping strategies following chronic stress exposure. *Behav Brain Res* 237:  
671 333-7
- 672 Mikasova L, Groc L, Choquet D, Manzoni OJ. 2008. Altered surface trafficking of  
673 presynaptic cannabinoid type 1 receptor in and out synaptic terminals parallels  
674 receptor desensitization. *Proc Natl Acad Sci U S A* 105: 18596-601
- 675 Mitchell VA, Aslan S, Safaei R, Vaughan CW. 2005. Effect of the cannabinoid ajulemic  
676 acid on rat models of neuropathic and inflammatory pain. *Neurosci Lett* 382: 231-  
677 5
- 678 Navia-Paldanius D, Aaltonen N, Lehtonen M, Savinainen JR, Taschler U, et al. 2015.  
679 Increased tonic cannabinoid CB1R activity and brain region-specific  
680 desensitization of CB1R Gi/o signaling axis in mice with global genetic knockout  
681 of monoacylglycerol lipase. *Eur J Pharm Sci* 77: 180-8
- 682 Pan B, Wang W, Long JZ, Sun D, Hillard CJ, et al. 2009. Blockade of 2-  
683 arachidonoylglycerol hydrolysis by selective monoacylglycerol lipase inhibitor 4-  
684 nitrophenyl 4-(dibenzo[d][1,3]dioxol-5-yl(hydroxy)methyl)piperidine-1-carboxylate  
685 (JZL184) Enhances retrograde endocannabinoid signaling. *J Pharmacol Exp*  
686 *Ther* 331: 591-7
- 687 Patel S, Kingsley PJ, Mackie K, Marnett LJ, Winder DG. 2009. Repeated homotypic  
688 stress elevates 2-arachidonoylglycerol levels and enhances short-term  
689 endocannabinoid signaling at inhibitory synapses in basolateral amygdala.  
690 *Neuropsychopharmacology* 34: 2699-709
- 691 Pennock RL, Dicken MS, Hentges ST. 2012. Multiple inhibitory G-protein-coupled  
692 receptors resist acute desensitization in the presynaptic but not postsynaptic  
693 compartments of neurons. *J Neurosci* 32: 10192-200
- 694 Pennock RL, Hentges ST. 2011. Differential expression and sensitivity of presynaptic  
695 and postsynaptic opioid receptors regulating hypothalamic proopiomelanocortin  
696 neurons. *J Neurosci* 31: 281-8
- 697 Pennock RL, Hentges ST. 2016. Desensitization-resistant and -sensitive GPCR-  
698 mediated inhibition of GABA release occurs by Ca<sup>2+</sup>-dependent and -  
699 independent mechanisms at a hypothalamic synapse. *J Neurophysiol* 115: 2376-  
700 88
- 701 Petrosino S, Palazzo E, de Novellis V, Bisogno T, Rossi F, et al. 2007. Changes in  
702 spinal and supraspinal endocannabinoid levels in neuropathic rats.  
703 *Neuropharmacology* 52: 415-22
- 704 Romero J, Garcia L, Fernandez-Ruiz JJ, Cebeira M, Ramos JA. 1995. Changes in rat  
705 brain cannabinoid binding sites after acute or chronic exposure to their  
706 endogenous agonist, anandamide, or to delta 9-tetrahydrocannabinol. *Pharmacol*  
707 *Biochem Behav* 51: 731-7
- 708 Rubino T, Viganò D, Massi P, Parolaro D. 2000. Changes in the cannabinoid receptor  
709 binding, G protein coupling, and cyclic AMP cascade in the CNS of rats tolerant

- 710 to and dependent on the synthetic cannabinoid compound CP55,940. *J*  
711 *Neurochem* 75: 2080-6
- 712 Ruiu S, Pinna GA, Marchese G, Mussinu JM, Saba P, et al. 2003. Synthesis and  
713 characterization of NESS 0327: a novel putative antagonist of the CB1  
714 cannabinoid receptor. *J Pharmacol Exp Ther* 306: 363-70
- 715 Schlosburg JE, Blankman JL, Long JZ, Nomura DK, Pan B, et al. 2010. Chronic  
716 monoacylglycerol lipase blockade causes functional antagonism of the  
717 endocannabinoid system. *Nat Neurosci* 13: 1113-9
- 718 Sheardown MJ, Nielsen EO, Hansen AJ, Jacobsen P, Honoré T. 1990. 2,3-Dihydroxy-6-  
719 nitro-7-sulfamoyl-benzo(F)quinoxaline: a neuroprotectant for cerebral ischemia.  
720 *Science* 247: 571-4
- 721 Sim LJ, Hampson RE, Deadwyler SA, Childers SR. 1996. Effects of chronic treatment  
722 with delta9-tetrahydrocannabinol on cannabinoid-stimulated [35S]GTPgammaS  
723 autoradiography in rat brain. *J Neurosci* 16: 8057-66
- 724 Smith FL, Fujimori K, Lowe J, Welch SP. 1998. Characterization of delta9-  
725 tetrahydrocannabinol and anandamide antinociception in nonarthritic and arthritic  
726 rats. *Pharmacol Biochem Behav* 60: 183-91
- 727 Sofia RD, Nalepa SD, Harakal JJ, Vassar HB. 1973. Anti-edema and analgesic  
728 properties of delta9-tetrahydrocannabinol (THC). *J Pharmacol Exp Ther* 186:  
729 646-55
- 730 Stella N, Schweitzer P, Piomelli D. 1997. A second endogenous cannabinoid that  
731 modulates long-term potentiation. *Nature* 388: 773-8
- 732 Straiker A, Mackie K. 2005. Depolarization-induced suppression of excitation in murine  
733 autaptic hippocampal neurones. *J Physiol* 569: 501-17
- 734 Thal DM, Yeow RY, Schoenau C, Huber J, Tesmer JJ. 2011. Molecular mechanism of  
735 selectivity among G protein-coupled receptor kinase 2 inhibitors. *Mol Pharmacol*  
736 80: 294-303
- 737 Tonsfeldt KJ, Suchland KL, Beeson KA, Lowe JD, Li MH, Ingram SL. 2016. Sex  
738 Differences in GABAA Signaling in the Periaqueductal Gray Induced by  
739 Persistent Inflammation. *J Neurosci* 36: 1669-81
- 740 Vargas KJ, Terunuma M, Tello JA, Pangalos MN, Moss SJ, Couve A. 2008. The  
741 availability of surface GABA B receptors is independent of gamma-aminobutyric  
742 acid but controlled by glutamate in central neurons. *J Biol Chem* 283: 24641-8
- 743 Vaughan CW, Christie MJ. 2005. Retrograde signalling by endocannabinoids. *Handb*  
744 *Exp Pharmacol*: 367-83
- 745 Vaughan CW, Connor M, Bagley EE, Christie MJ. 2000. Actions of cannabinoids on  
746 membrane properties and synaptic transmission in rat periaqueductal gray  
747 neurons in vitro. *Mol Pharmacol* 57: 288-95
- 748 Vecchiarelli HA, Morena M, Keenan CM, Chiang V, Tan K, et al. 2021. Comorbid  
749 anxiety-like behavior in a rat model of colitis is mediated by an upregulation of  
750 corticolimbic fatty acid amide hydrolase. *Neuropsychopharmacology* 46: 992-  
751 1003
- 752 Vigot R, Barbieri S, Bräuner-Osborne H, Turecek R, Shigemoto R, et al. 2006.  
753 Differential compartmentalization and distinct functions of GABAB receptor  
754 variants. *Neuron* 50: 589-601



- 755 Walker JM, Huang SM, Strangman NM, Tsou K, Sanudo-Pena MC. 1999. Pain  
756 modulation by release of the endogenous cannabinoid anandamide. *Proc Natl*  
757 *Acad Sci U S A* 96: 12198-203
- 758 Wamsteeker JI, Kuzmiski JB, Bains JS. 2010. Repeated stress impairs  
759 endocannabinoid signaling in the paraventricular nucleus of the hypothalamus. *J*  
760 *Neurosci* 30: 11188-96
- 761 Wang HL. 2000. A cluster of Ser/Thr residues at the C-terminus of mu-opioid receptor is  
762 required for G protein-coupled receptor kinase 2-mediated desensitization.  
763 *Neuropharmacology* 39: 353-63
- 764 Wetherington JP, Lambert NA. 2002. Differential desensitization of responses mediated  
765 by presynaptic and postsynaptic A1 adenosine receptors. *J Neurosci* 22: 1248-55
- 766 Williams JT, Ingram SL, Henderson G, Chavkin C, von Zastrow M, et al. 2013.  
767 Regulation of mu-opioid receptors: desensitization, phosphorylation,  
768 internalization, and tolerance. *Pharmacol Rev* 65: 223-54
- 769 Wilson AR, Maher L, Morgan MM. 2008. Repeated cannabinoid injections into the rat  
770 periaqueductal gray enhance subsequent morphine antinociception.  
771 *Neuropharmacology* 55: 1219-25
- 772 Wilson-Poe AR, Lau BK, Vaughan CW. 2015. Repeated morphine treatment alters  
773 cannabinoid modulation of GABAergic synaptic transmission within the rat  
774 periaqueductal grey. *Br J Pharmacol* 172: 681-90
- 775 Wilson-Poe AR, Morgan MM, Aicher SA, Hegarty DM. 2012. Distribution of CB1  
776 cannabinoid receptors and their relationship with mu-opioid receptors in the rat  
777 periaqueductal gray. *Neuroscience* 213: 191-200
- 778 Wilson-Poe AR, Pocius E, Herschbach M, Morgan MM. 2013. The periaqueductal gray  
779 contributes to bidirectional enhancement of antinociception between morphine  
780 and cannabinoids. *Pharmacol Biochem Behav* 103: 444-9
- 781 Wilson-Poe AR, Wiese B, Kibaly C, Lueptow L, Garcia J, et al. 2021. Effects of  
782 inflammatory pain on CB1 receptor in the midbrain periaqueductal gray. *Pain*  
783 *Rep* 6: e897
- 784 Zhang J, Ferguson SS, Barak LS, Bodduluri SR, Laporte SA, et al. 1998. Role for G  
785 protein-coupled receptor kinase in agonist-specific regulation of mu-opioid  
786 receptor responsiveness. *Proc Natl Acad Sci U S A* 95: 7157-62
- 787

788 **Figure 1**  
789

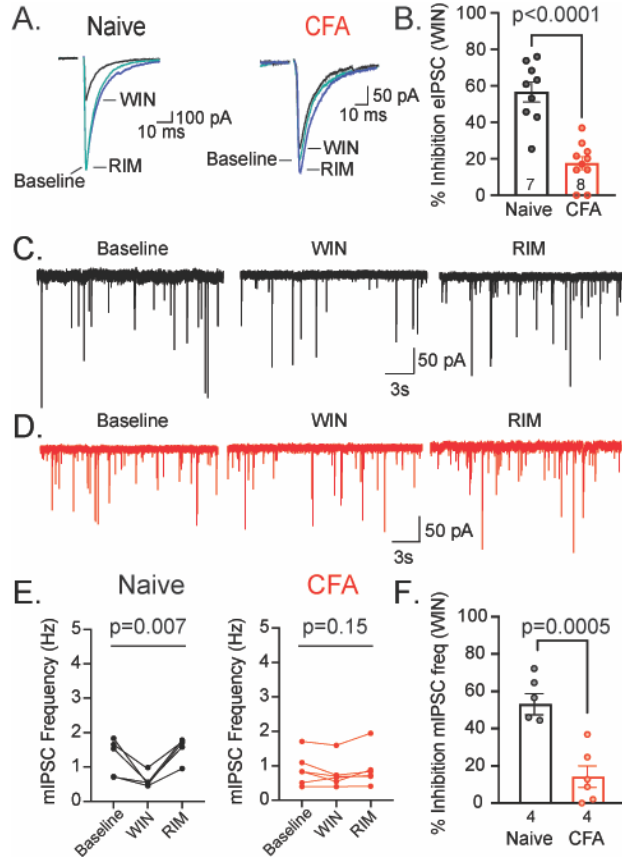

790  
791

792 **Figure 1: Persistent inflammation reduces WIN-induced inhibition of GABA release.** (A)  
793 Representative traces of eIPSCs isolated in NBQX recorded from vIPAG neurons in  
794 baseline (5 $\mu$ M; teal), the cannabinoid receptor agonist WIN,55212 (WIN 3  $\mu$ M; black)  
795 and the CB1R selective antagonist rimonabant (RIM; 3  $\mu$ M; blue) from naïve (left) and  
796 CFA-treated (right) animals. (B) Percent inhibition of eIPSC amplitude by WIN in slices  
797 from naïve (black bar) and CFA-treated rats (red bar) (unpaired t-test,  $t_{14}=5.34$ ;  
798  $p=0.0002$ ). (C,D) Representative trace of mIPSCs recorded from vIPAG neurons in  
799 baseline containing TTX (500 nM) and NBQX (5  $\mu$ M), WIN (3  $\mu$ M), and RIM (3  $\mu$ M) from  
800 slices of naïve (black, C) or CFA-treated rats (red, D). (E) mIPSC frequency at baseline,  
801 WIN, and RIM from slices of naïve (black) and CFA-treated (red) rats. (F) WIN percent  
802 inhibition of mIPSC frequency from naïve (black) and CFA-treated (red) rats (unpaired t-  
803 test,  $t_{(10)}=4.65$ ;  $p=0.0009$ ).

804

805 **Figure 2**

806

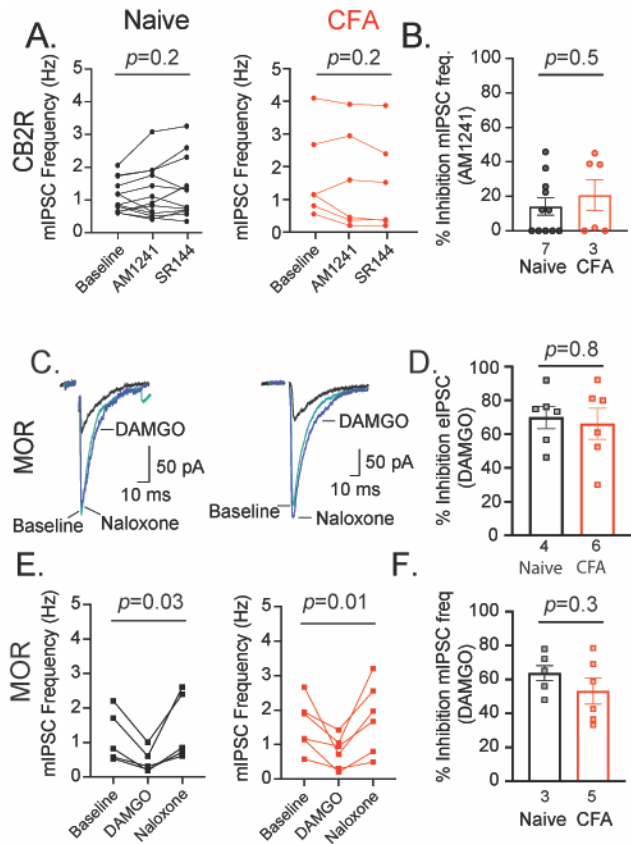

807

808

809 **Figure 2: Persistent inflammation does not affect CB2R or MOR suppression of GABA**  
810 **release. (A)** spontaneous mIPSC frequency in slices from naïve (black) or CFA-treated  
811 (red) animals during baseline, CB2R agonist AM1241 (3  $\mu$ M) and CB2R antagonist  
812 SR144528 (3  $\mu$ M). **(B)** mIPSC frequency inhibition by AM1241 (unpaired t-test;  $t_{15}=0.71$ ;  
813  $p=0.5$ ). **(C)** Representative eIPSC traces at baseline (5  $\mu$ M; teal), DAMGO (1  $\mu$ M; black)  
814 and naloxone (1 $\mu$ M; blue). **(D)** Percent inhibition of eIPSCs by DAMGO in naïve (black  
815 bar) and CFA-treated (red bar) conditions (unpaired t-test,  $t_{10}= 0.32$ ;  $p=0.8$ ). **(E)**  
816 spontaneous mIPSC frequency in slices from naïve (black) or CFA-treated (red) animals  
817 during baseline, DAMGO (1 $\mu$ M), and naloxone (1 $\mu$ M). **(F)** mIPSC frequency inhibition  
818 by DAMGO (unpaired t-test,  $t_9=1.11$ ;  $p=0.3$ ). Error bars represent SEM, dots indicate  
819 individual recordings and numbers represent the number of rats represented per bar.

820

821 **Figure 3**

822

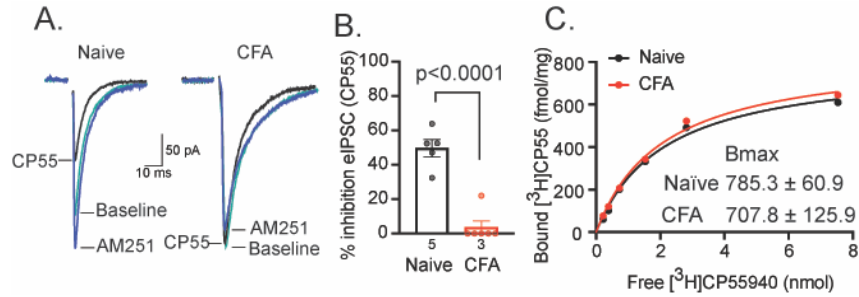

823

824

825 Figure 3: Cannabinoid receptor binding is unaffected by persistent inflammation. (A)

826 Representative traces of eIPSC recorded from vIPAG neurons in baseline containing

827 NBQX (5µM; teal; Baseline), cannabinoid agonist CP-55,940 (3µM; black; CP55), and

828 CB1-selective antagonist AM251 (3µM; blue) from naïve and CFA-treated rats. (B)

829 Percent inhibition of eIPSC amplitude by CP-55,940 in vIPAG slices from naïve (black

830 bar) or CFA-treated (red bar) rats (unpaired t-test,  $t_9=7.8$ ;  $p < 0.0001$ ). (C) Representative

831 radioligand binding saturation curve with [ $^3\text{H}$ ]CP-55,940 and vIPAG tissue from naïve

832 (black) and CFA-treated (red) rats (vIPAG from 8 rats pooled per curve, statistics run on

833 average of 3 curves). Error bars represent SEM, dots indicate individual recordings and

834 numbers represent the number of rats per bar.



835 **Figure 4**  
836

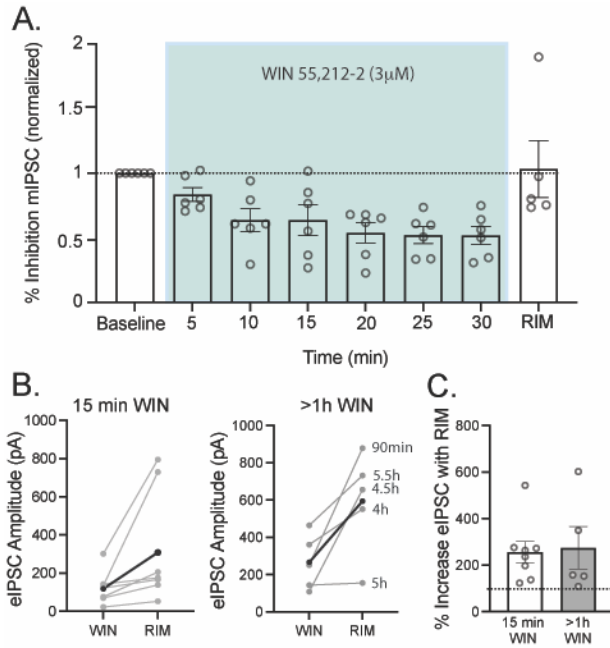

837  
838

839 **Figure 4: CB1R function is sustained throughout 5h WIN-induced activation** (A) Percent  
840 inhibition of mIPSC frequency in vPAG neurons during 30 min of WIN exposure (3 µM;  
841 n=8). Data are normalized to mIPSC frequency during baseline in TTX (500 nM) and  
842 NBQX (5 µM). WIN (3 µM) reduced mIPSC frequency over the first 10 minutes of drug  
843 application. Frequency remained reduced for the entirety of the 30 min drug application  
844 and was reversed by RIM (3 µM; two-tailed paired t-test,  $t_7=7$ ;  $p=0.016$ ). (B) eIPSC  
845 amplitude with bath application of CB1R selective antagonist RIM (3µM) after 15  
846 minutes in WIN (3 µM; paired t-test,  $t_7=2.42$ ;  $p=0.046$ ; data from 6 animals) or >1h WIN  
847 incubation (3 µM; paired t-test,  $t_5=3.53$ ;  $p=0.02$ ; 5 cells from 3 animals). Average is  
848 shown in thick black. (C) Bar graph depicting RIM percent increase from WIN after 15  
849 minutes in WIN (white bar) or >1 hour in WIN (gray bar; unpaired t-test,  $t_{11}=0.2$ ;  $p=0.8$ ).  
850 Error bars represent SEM, dots indicate individual neurons.

851 **Figure 5**

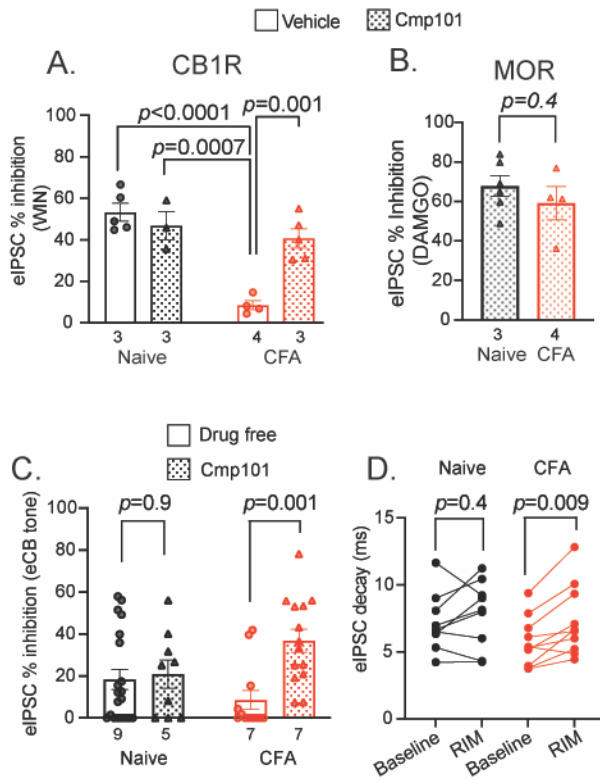

852  
853

854 Figure 5: Compound 101 (Cmp101) incubation recovers CB1R inhibition of GABA  
855 release after persistent inflammation (A) WIN (3  $\mu$ M) inhibition of eIPSC amplitudes  
856 from naïve (black) or CFA-treated (red) rats. vIPAG slices were incubated in vehicle (no  
857 fill) or Cmp101 (filled bar) for >1h. Cmp101 incubation fully recovered CB1R signaling in  
858 slices from CFA-treated rats (2-way ANOVA: main effect of Cmp101:  $F(1,13)=7.6$ ;  
859  $p=0.016$ ; main effect of CFA:  $F(1,13)=29.9$ ;  $p=0.0001$ ; CFA x Cmp101 interaction:  
860  $F(1,13)=17.29$ ,  $p=0.001$ ). Post-hoc analysis (Tukey test) reveals the effect of WIN in  
861 CFA-treated slices incubated in vehicle was significantly reduced compared to all other  
862 conditions. (B) DAMGO (1  $\mu$ M) inhibition of eIPSC amplitude after Cmp101 (30  $\mu$ M)  
863 incubation from naïve (black bar) or CFA-treated (red bar) rats. (C) Cmp101 incubation  
864 reveals eCB tone in recordings from CFA-treated rats (2-way ANOVA: main effect of  
865 Cmp101:  $F(1,46)=6.06$ ;  $p=0.02$ ). Post-hoc analysis (Šidák's multiple comparisons test)  
866 reveals a significant effect of Cmp101 in CFA-treated rats but not naïve. RIM and NESS  
867 are combined. (D) eIPSC decay at baseline and after addition of RIM in slices from

868 naïve (black) and CFA-treated (red) rats (2-way ANOVA: main effect of RIM  
869  $F(1,17)=9.98$ ;  $p=0.006$ ; Šídák post-hoc test). Error bars represent SEM, dots indicate  
870 individual neurons and numbers represent the number of animals per bar.

871

872

873 **Figure 6**

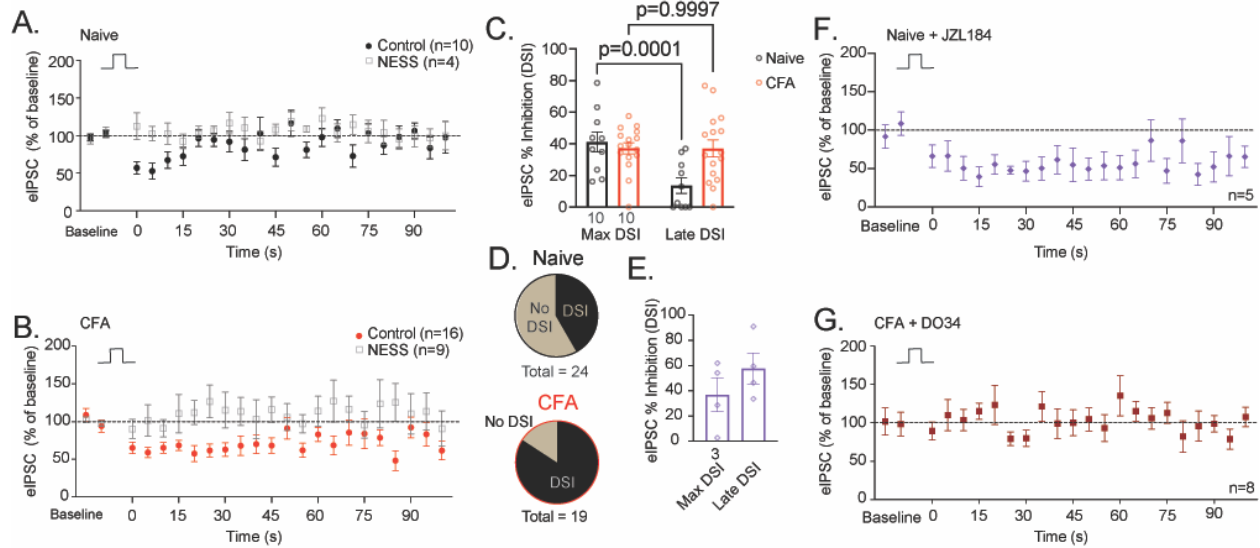

874  
875

876 **Figure 6: Persistent inflammation increases 2-AG activity at the CB1R.** (A) Summary of  
877 DSI (5s; +20 mV) in tissue from naïve rats (black circles; n=10 recordings from 10 rats).  
878 DSI is blocked by NESS (0.5 $\mu$ M; gray open boxes; n=4 recordings from 3 rats) (B)  
879 Summary of DSI in tissue from CFA-treated rats (red dots; n=16 recordings from 10  
880 rats). DSI is blocked by NESS (0.5 $\mu$ M; gray open boxes; n=9 recordings from 5 rats).  
881 (C) Quantification of eIPSC % inhibition at max DSI and late DSI in vPAG tissue from  
882 naïve (black) and CFA-treated (red) animals (2-way repeated-measures ANOVA: main  
883 effect DSI length:  $F(1,24)=14.5$ ;  $p=0.0009$ ; interaction DSI length x CFA:  $F(1,24)=14.3$ ;  
884  $p=0.0009$ ; Šídák post-hoc test). (D) Proportion of patched neurons that respond to DSI.  
885 In slices from naïve rats, after depolarization 10 neurons exhibited DSI and 14 did not.  
886 In slices from CFA treated rats, 16 exhibited DSI and 3 did not. The proportion of  
887 neurons that produced DSI was significantly higher in slices from CFA-treated slices  
888 (Fishers exact test:  $p=0.006$ ). (E) Quantification of eIPSC % inhibition at max DSI and  
889 late DSI in vPAG tissue from naïve animals incubated in MAGL inhibitor JZL184 (1  $\mu$ M,  
890 >1h). (F) Summary of DSI in tissue from naïve rats after incubation in JZL184 (1  $\mu$ M,  
891 >1h). (G) Summary of DSI in tissue from CFA-treated rats incubated in DAGL $\alpha$  inhibitor,  
892 DO34 (1  $\mu$ M incubation; >1h). Dots represent individual recordings, numbers below the  
893 bar represent number of animals; error bars represent SEM.
